# Supplementary material
Source: Springer Nature journal article supplement (https://www.springermedizin.de/resource/supplementary/12916_2014_992_MOESM9_ESM.pdf/9598768)
Supplement: MOESM9 [file 9598768]

| TBQ items                                                                                                                                                                                                          | USA<br>(n=351) | United<br>Kingdom<br>(n=53) | Canada<br>(n=51) | Australia/<br>New<br>Zealand<br>(n=21) | Other*<br>(n=53**) |
|--------------------------------------------------------------------------------------------------------------------------------------------------------------------------------------------------------------------|----------------|-----------------------------|------------------|----------------------------------------|--------------------|
| The taste, shape or size of your tablets and/or the annoyances caused by your injections (e.g., pain, bleeding, bruising or scars)                                                                                 | 2,6 ± 3.0      | 3,5 ± 2.9                   | 1,9 ± 2.7        | 3 ± 3.1                                | 2,1 ± 2.9          |
| The number of times you should take your medication daily                                                                                                                                                          | 2,4 ± 2.5      | 3.0 ± 2.8                   | 2,7 ± 2.9        | 1,4 ± 1.7                              | 2,2 ± 2.6          |
| The efforts you make <b>not to forget to take your medications</b> (e.g., managing your treatment when you are away from home, preparing and using pillboxes)                                                      | 2,9 ± 2.9      | 4.0 ± 3.2                   | 2,7 ± 2.6        | 2,6 ± 2.7                              | 2,4 ± 2.9          |
| The <b>necessary precautions when taking your medication</b> (e.g., taking them at specific times of the day or meals, not being able to do certain things after taking medications such as driving or lying down) | 3,2 ± 3.1      | 4,2 ± 3.1                   | 3.0 ± 2.9        | 2,9 ± 3.1                              | 2,7 ± 3.2          |
| <b>Lab tests and other exams</b> (e.g., blood tests or radiology): frequency, time spent and associated nuisances or inconveniences                                                                                | 3,1 ± 3.0      | 3.0 ± 2.9                   | 1,9 ± 2.5        | 3,2 ± 3.3                              | 2,7 ± 2.8          |
| <b>Self-monitoring</b> (e.g., taking your blood pressure or checking your blood sugar): frequency, time spent and associated nuisances or inconveniences                                                           | 1,4 ± 2.5      | 1.0 ± 2.1                   | 0,6 ± 1.1        | 1,7 ± 2.8                              | 1,6 ± 2.5          |
| <b>Doctor visits and other appointments:</b> frequency and time spent for these visits and difficulties finding healthcare providers                                                                               | 3,9 ± 3.3      | 3,8 ± 3.2                   | 2,9 ± 3.1        | 4,1 ± 3.4                              | 3,3 ± 3.2          |
| The difficulties you could have in your <b>relationships with healthcare providers</b> (e.g., feeling not listened to enough or not taken seriously)                                                               | 3,7 ± 3.5      | 5,4 ± 3.8                   | 3,6 ± 3.5        | 3,6 ± 3.5                              | 3,5 ± 3.5          |
| <b>Arranging medical appointments and/or transportation</b> (doctors visits, lab tests and other exams) and reorganizing your schedule around these appointments                                                   | 3,8 ± 3.4      | 4,4 ± 3.4                   | 2,6 ± 2.6        | 4,2 ± 3.5                              | 2,9 ± 3.0          |
| The <b>administrative burden related to healthcare</b> (e.g., all you have to do for hospitalizations, insurance reimbursements and/or obtaining social services)                                                  | 3,8 ± 3.4      | 2,8 ± 3.4                   | 2,1 ± 2.5        | 3,8 ± 3.4                              | 2,8 ± 3.1          |
| The <b>financial burden associated with your healthcare</b> (e.g., out-of-pocket expenses or expenses not covered by insurance)                                                                                    | 5,6 ± 3.6      | 4.0 ± 3.9                   | 3,8 ± 3.6        | 5,1 ± 3.7                              | 4 ± 3.7            |
| The <b>burden related to dietary changes</b> (e.g., avoiding certain foods or alcohol, having to quit smoking)                                                                                                     | 3,1 ± 3.3      | 4.0 ± 3.6                   | 3,3 ± 3.4        | 3,8 ± 4.0                              | 3,6 ± 3.6          |
| The burden related to <b>doctors' recommendations to practice physical activity</b> (e.g., walking, jogging, swimming)                                                                                             | 3,7 ± 3.4      | 4,6 ± 3.8                   | 3,1 ± 3.2        | 4,3 ± 3.7                              | 3,2 ± 3.6          |
| How does your healthcare impact your <b>relationships with others</b> (e.g., being dependent on others and feeling like a burden to them, being embarrassed to take your medications in public)                    | 4,9 ± 3.7      | 5,7 ± 3.7                   | 4 ± 3.5          | 6,7 ± 3.8                              | 4,1 ± 3.4          |
| <b>'The need for medical healthcare on a regular basis reminds me of my health problems'</b>                                                                                                                       | 6,1 ± 3.6      | 5,2 ± 3.8                   | 5,3 ± 3.7        | 6,4 ± 3.4                              | 5,4 ± 3.5          |

Item scores are presented as mean (SD). Highest scores are in red and lowest in green. \*Other includes Belgium, Brazil, Chile, Czech Republic, Denmark, Finland, France, Germany, India, Ireland, Israel, Italy, Malaysia, Norway, Oman, Portugal, Russia, South Africa, Spain, Switzerland, Ukraine, Uzbekistan.

\*\*Participants with missing country of residence (n=81) were excluded from the analysis
